# Supplementary material
Source: MDPI journal article supplement (https://www.mdpi.com/2073-4395/12/12/2912)
Supplement: s1 [file s1]

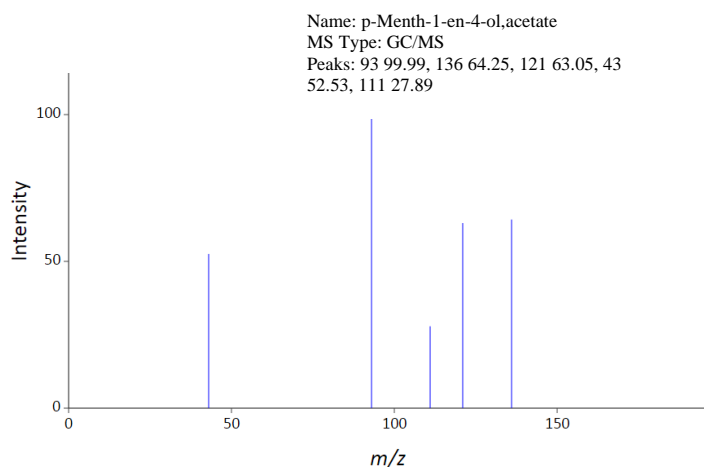

**Figure S1.** Mass spectra of p-Menth-1-en-4-ol, acetate obtained from GC-MS.

**Table S1.** Effect of spacing of plants and date of sowing on yield of chamomile (*Matricaria chamomilla*) during 2020-21 and 2021-22.

|                  | 2020-21                                 |                                           |                                   | 2021-22                                 |                                           |                                   |
|------------------|-----------------------------------------|-------------------------------------------|-----------------------------------|-----------------------------------------|-------------------------------------------|-----------------------------------|
| Treatment Symbol | Dry flower yield (Kg ha <sup>-1</sup> ) | Fresh flower yield (Kg ha <sup>-1</sup> ) | No. of flower plant <sup>-1</sup> | Dry flower yield (Kg ha <sup>-1</sup> ) | Fresh flower yield (Kg ha <sup>-1</sup> ) | No. of flower plant <sup>-1</sup> |
| D1P1             | 313±10                                  | 1759±41                                   | 186±06                            | 325±11                                  | 1800±42                                   | 196±06                            |
| D1P2             | 368±12                                  | 1907±45                                   | 197±07                            | 375±09                                  | 1900±40                                   | 200±07                            |
| D1P3             | 403±16                                  | 2133±60                                   | 214±08                            | 398±08                                  | 2150±39                                   | 206±08                            |
| D2P1             | 373±13                                  | 2040±36                                   | 199±09                            | 364±07                                  | 2100±26                                   | 205±09                            |
| D2P2             | 400±19                                  | 2119±26                                   | 213±04                            | 410±12                                  | 2170±27                                   | 225±03                            |
| D2P3             | 463±21                                  | 2235±42                                   | 269±05                            | 453±13                                  | 2265±29                                   | 275±05                            |
| D3P1             | 277±10                                  | 1676±29                                   | 179±06                            | 270±10                                  | 1700±30                                   | 186±06                            |
| D3P2             | 335±09                                  | 1780±30                                   | 183±07                            | 325±09                                  | 1756±31                                   | 180±04                            |
| D3P3             | 388±12                                  | 2003±41                                   | 194±09                            | 390±08                                  | 2035±25                                   | 200±05                            |
| D4P1             | 297±14                                  | 1610±34                                   | 125±05                            | 302±12                                  | 1670±29                                   | 135±06                            |
| D4P2             | 323±12                                  | 1778±35                                   | 129±06                            | 302±13                                  | 1800±28                                   | 137±05                            |
| D4P3             | 354±15                                  | 1705±30                                   | 132±04                            | 359±09                                  | 1752±27                                   | 139±04                            |
